# Supplementary material
Source: PubMed Central journal article supplement (PMC9071387)
Supplement: gbab152_suppl_supplementary_materials.pdf [file gbab152_suppl_supplementary_materials.pdf]

**Risk of Dementia differs across Lifestyle Engagement Subgroups: A Latent Class and Time  
to Event Analysis in Community-Dwelling Older Adults**

Kyle D. Moored, PhD, Karen Bandeen-Roche, PhD, Beth E. Snitz, PhD, Steven T. DeKosky,  
MD, Jeff D. Williamson, MD, MHS, Annette L. Fitzpatrick, PhD, & Michelle C. Carlson, PhD

**Supplemental Materials**

## Appendix A. Lifestyle Activity Questionnaire

*In the past year, have you spent your time (5=Everyday 4=A few times a week 3=Once a week 2=2 to 3 times a mo. 1=Once a month 0=< 1/mo. or never):*

| Item                                                                                           | Abbreviation      | Parisi et al. (2014) Domain Category |
|------------------------------------------------------------------------------------------------|-------------------|--------------------------------------|
| 1 Doing things like sewing, mending, decorating, fixing things, or building?                   | Sewing            | Creative                             |
| 2 Cooking, baking or barbecuing?                                                               | Cooking           | Creative                             |
| 3 Singing or playing a musical instrument?                                                     | Sing/Instrument   | Creative                             |
| 4 Drawing or painting?                                                                         | Drawing           | Creative                             |
| 5 Looking at paintings or other art?                                                           | View Art          | Creative                             |
| 6 Reading a newspaper?                                                                         | Newspaper         | Intellectual                         |
| 7 Reading a book?                                                                              | Books             | Intellectual                         |
| 8 Talking about local or national problems or issues?                                          | Issues            | Intellectual                         |
| 9 Doing crossword puzzles?                                                                     | CW Puzzles        | Intellectual                         |
| 10 Balancing your checkbook?                                                                   | Checkbook         | Intellectual                         |
| 11 Taking courses or classes (credit or non-credit)?                                           | Courses           | Intellectual                         |
| 12 Using a computer for word processing or for email/internet access?                          | Computer          | Intellectual                         |
| 13 Listening to music?                                                                         | Radio (Music)     | Passive                              |
| 14 Listening to the radio (other than to music)?                                               | Radio (not music) | Passive                              |
| 15 Watching TV?                                                                                | TV                | Passive                              |
| 16 Working in your garden, as permitted by the weather?                                        | Gardening         | Physical                             |
| 17 Hunting, Fishing, Camping                                                                   | Hunt/Camp         | Physical                             |
| 18 Shopping (grocery store, hardware store, mall outlets)?                                     | Shopping          | Physical                             |
| 19 Going to the movies?                                                                        | Movies            | Social                               |
| 20 Going to plays or concerts?                                                                 | Concerts          | Social                               |
| 21 Attending church or other religious services?                                               | Church            | Social                               |
| 22 Participating in a church, social or civic club or organization?                            | Social club       | Social                               |
| 23 Having people visit at your home, or visiting at someone else's home?                       | Visiting          | Social                               |
| 24 Assisting family members or family on regular basis? (ex. caring for them or doing errands) | Assist family     | Social                               |
| 25 Playing cards or games with others?                                                         | Playing cards     | Social                               |
| 26 Doing volunteer work?                                                                       | Volunteering      | Social                               |

## **Appendix B. Modified Center for Epidemiologic Studies Depression Scale (CES-D)**

*How often have you felt the following during the past week?*

*(0 = rarely/none of the time (less than 1 day), 1 = some or a little of the time (1 to 2 days), 2 = a moderate amount of time (2 to 4 days), 3 = most of the time, 9 = refused/don't know)*

1. I was bothered by things that usually don't bother me.
2. I had trouble keeping my mind on what I was doing.
3. I felt everything I did was an effort.
4. I felt depressed.
5. I felt hopeful about the future.
6. I felt fearful.
7. My sleep was restless.
8. I was happy.
9. I felt lonely.
10. I could not get going.

### Appendix C. Fitting latent class models using random samples of activities by type

| Type             | Semi-random Sample |               |               |               |               |
|------------------|--------------------|---------------|---------------|---------------|---------------|
|                  | One                | Two           | Three         | Four          | Five          |
| Intellectual (4) | Drawing            | CW Puzzles    | View Art      | Drawing       | Sing/Paint    |
|                  | Sing/Paint         | View Art      | Computer      | Courses       | CW Puzzles    |
|                  | Sewing             | Computer      | Sewing        | View Art      | View Art      |
|                  | Books              | Sewing        | Books         | Sewing        | Computer      |
| Physical (1)     | Gardening          | Gardening     | Walking       | Gardening     | Walking       |
| Social (4)       | Movies             | Movies        | Babysitting   | Movies        | Babysitting   |
|                  | Babysitting        | Babysitting   | Social clubs  | Playing Cards | Concerts      |
|                  | Playing Cards      | Concerts      | Attend church | Social clubs  | Playing Cards |
|                  | Volunteering       | Assist family | Assist family | Attend church | Attend church |
| Type             | Six                | Seven         | Eight         | Nine          | Ten           |
| Intellectual (4) | Sing/Paint         | Courses       | Drawing       | Courses       | Sing/Paint    |
|                  | CW Puzzles         | View Art      | Courses       | CW Puzzles    | View Art      |
|                  | View Art           | Sewing        | CW Puzzles    | Computer      | Sewing        |
|                  | Computer           | Books         | Books         | Books         | Books         |
| Physical (1)     | Walking            | Walking       | Gardening     | Walking       | Gardening     |
| Social (4)       | Volunteering       | Movies        | Movies        | Concerts      | Babysitting   |
|                  | Social clubs       | Babysitting   | Babysitting   | Playing Cards | Concerts      |
|                  | Attend church      | Social clubs  | Concerts      | Volunteering  | Playing Cards |
|                  | Assist family      | Assist family | Attend church | Social clubs  | Volunteering  |

Note. Four intellectual, one physical, and four social activities chosen at random for each set.

CW = crossword

Table C.1. Frequency of Best Fitting Models by Bayesian Information Criterion and Bootstrapped Likelihood Ratio Tests for Ten Semi-Random Subsets of Activities

| Classes         | BIC | BLRT |
|-----------------|-----|------|
| 2-class         | 0   | 0    |
| 3-class         | 5   | 0    |
| 4-class         | 4   | 3    |
| 5-class         | 1   | 7    |
| $\geq 6$ -class | 0   | 0    |

Note. For models where convergence was not achieved or that had more than 3 parameters assigned to extreme boundary values, the  $n-1$  class model was chosen as the best fitting model for that criteria. BIC = Bayesian Information Criteria, BLRT = Bootstrapped Likelihood Ratio Test

Table C.2. Fit Statistics for Latent Class Models Including All 18 Activities

|                          | No. of classes |         |         |         |         |
|--------------------------|----------------|---------|---------|---------|---------|
|                          | 2              | 3       | 4       | 5       | 6       |
| No. of parameters        | 37             | 56      | 75      | 94      | 113     |
| Log-likelihood           | -30256         | -29994  | -29811  | -29681  | -29621  |
| AIC                      | 60587          | 60099   | 59773   | 59550   | 59468   |
| BIC                      | 60810          | 60437   | 60225   | 60117   | 60149   |
| N-adjusted BIC           | 60692          | 60259   | 59987   | 59818   | 59790   |
| LMR/BLRT null hypothesis | 1 vs. 2        | 2 vs. 3 | 3 vs. 4 | 4 vs. 5 | 5 vs. 6 |
| LMR p-value              | <0.001         | <0.001  | 0.061   | 0.399   | 0.351   |
| BLRT p-value             | <0.001         | <0.001  | <0.001  | <0.001  | <0.001  |
| Entropy                  | 0.637          | 0.626   | 0.621   | 0.625   | 0.605   |

Note. No. = number, AIC = Akaike Information Criterion, BIC = Bayesian Information Criterion, LMR = Lo-Mendell-Rubin test, Prop. = proportion. The LMR and BLRT null hypothesis is that a model of  $k$  classes does not fit significantly better than a model of  $k-1$  classes.

## Appendix D. Comparison of 4-Class to 3- and 5-Class Models

Figure D.1 includes plots of the item-response probabilities of activity engagement by latent class for the 3- and 5-class models. The 3-class model was very similar in structure to Classes 1 (Variety), 3 (Social), and 4 (Least Active) in the 4-class model. The primary difference between the 3- and 4-class models was the addition of Class 2 (Intellectual), which primarily split off from Class 1 (Variety). Comparing Class 1 in both models, the addition of Class 2 led to slight increases in item-response probabilities for social institutional activities (e.g., volunteering, church) in Class 1. This further supports the characterization of Class 2 as a less social but intellectually-active group.

The 5-class model had an additional group (Class 5) that was similar in structure to the Intellectual (Class 2) and Social (Class 3) groups in the 4-class model, but was less likely to report social institutional activities. The differences in intellectual activities between these classes were inconsistent. For example, Class 5 had a higher likelihood of engagement in “drawing” and “sewing” compared to Class 2 (Intellectual), but less likelihood for “taking courses,” “viewing art,” and “using computers.” We did not have any *a priori* hypotheses suggesting groups would differ on these specific activities. Furthermore, the large overlap in the confidence intervals for the item-response probabilities between this class and others in the 5-class model made it difficult to discern whether these estimates were meaningfully different and whether Class 5 was a truly distinct group. Therefore, we selected the 4-class model for subsequent analyses.

## Sensitivity Analyses

***Class assignment.*** After class enumeration, class assignment was done using two methods: 1) modal class assignment, where individuals are assigned to the class with the highest posterior probability, and 2) using the Vermunt (2010) 3-step approach. The former method has been found to have less downward-bias of the associations between latent class and the outcome when compared to other posterior-probability based assignment methods (e.g., pseudo-class assignment; Lanza et al., 2013). The Vermunt (2010) method is a modification of the approach by Bolck, Croon, and Hagenaars et al. (2004), where weights for individual participants are used as training variables to assign them to latent classes. This approach is thought to better account for potential error due to misclassification and may produce estimates with less downward-bias compared to posterior-probability-based approaches (Lanza et al., 2013; Vermunt, 2010).

Using the Vermunt (2010) approach yielded similar results to using modal class assignment (Table D.1). The Social group no longer had a significant difference in hazards of dementia compared to the Least Active group in the unadjusted model (HR=.77, 95% CI:[.57,1.03], p=.077). The Variety group (Class 1) had a lower risk of incident dementia compared to the Least Active group in both the unadjusted (HR=.55, CI:[.40,.75], p<.001) and adjusted models (HR=.58, CI:[.41,.81], p=.002). Stratifying the analysis by MCI status revealed that this association was maintained for those without baseline MCI only (HR=.61, CI:[.40,.94], p=.024). The Intellectual group (Class 2) also had a lower risk of incident dementia compared to the Least Active group in both the unadjusted (HR=.43, CI:[.27,.68], p<.001) and adjusted models (HR=.50, CI:[.30,.81], p=.005). Stratifying the analysis by MCI status revealed that this association was maintained for those without baseline MCI only (HR=.54, CI:[.30,.97], p=.039).

***Covariate distribution by class.*** Examining the propensity scores for each class (Figure D.2) revealed some variation in covariate ranges for the Variety (Class 1), Social (Class 3), and



Least Active groups (Class 4). We therefore conducted a sensitivity analysis eliminating individuals with scores outside the range that was consistent across classes (Supplemental Figure 4.2). Individuals with Class 1 propensity scores  $>.52$  or  $< .04$ , Class 3 scores  $< .16$ , or Class 4 scores  $> .60$  were removed ( $n=59$ , 13 dementia cases). Removing these individuals did not change the prior findings (Table D.2).

## References

- Bolck, A., Croon, M., & Hagenaars, J. (2004). Estimating Latent Structure Models with Categorical Variables: One-Step Versus Three-Step Estimators. *Political Analysis*, *12*(01), 3–27. <https://doi.org/10.1093/pan/12ph001>
- Lanza, S. T., Tan, X., & Bray, B. C. (2013). Latent Class Analysis With Distal Outcomes: A Flexible Model-Based Approach. *Structural Equation Modeling: A Multidisciplinary Journal*, *20*(1), 1–26. <https://doi.org/10.1080/10705511.2013.742377>
- Vermunt, J. K. (2010). Latent class modeling with covariates: Two improved three-step approaches. *Political Analysis*, *18*(04), 450–469. <https://doi.org/10.1093/pan/18mpq025>

Figure D.1. Probabilities of Engagement in Each Activity by Latent Class for the 3- and 5-Class Models

### A. 3-Class Model

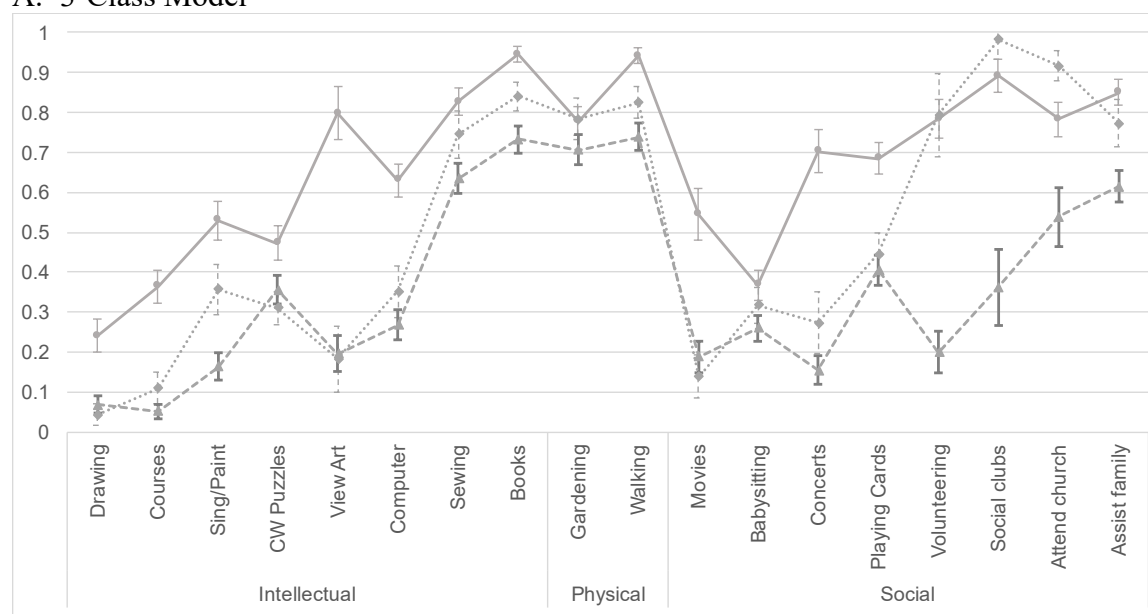

### B. 5-Class Model

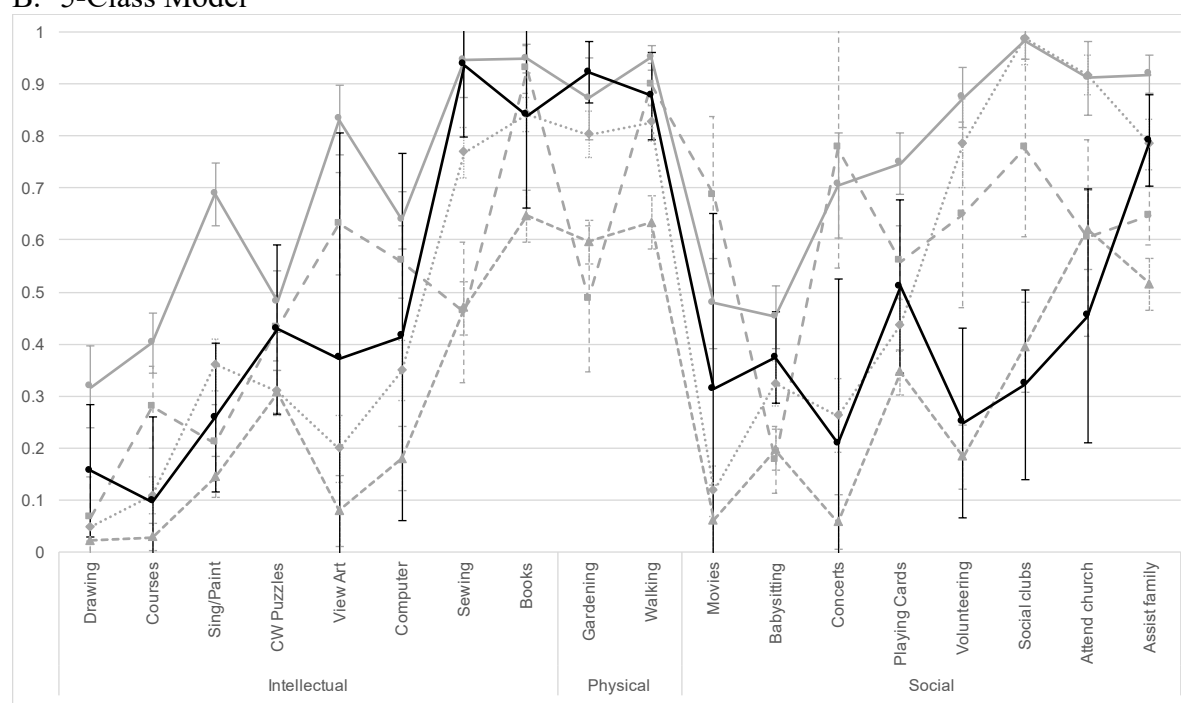

Note. CW = crossword. Error bars represent 95% confidence intervals for item-response probability estimates. Legend = grey solid/circles (Class 1: Variety), grey dashed/squares (Class 2: Intellectual), grey dotted/diamonds (Class 3: Social), grey dashed/triangles (Class 4: Least Active), black solid/circles (Class 5)

Figure D.2. Boxplots of Propensity Scores Stratified by Assigned Lifestyle Engagement Group

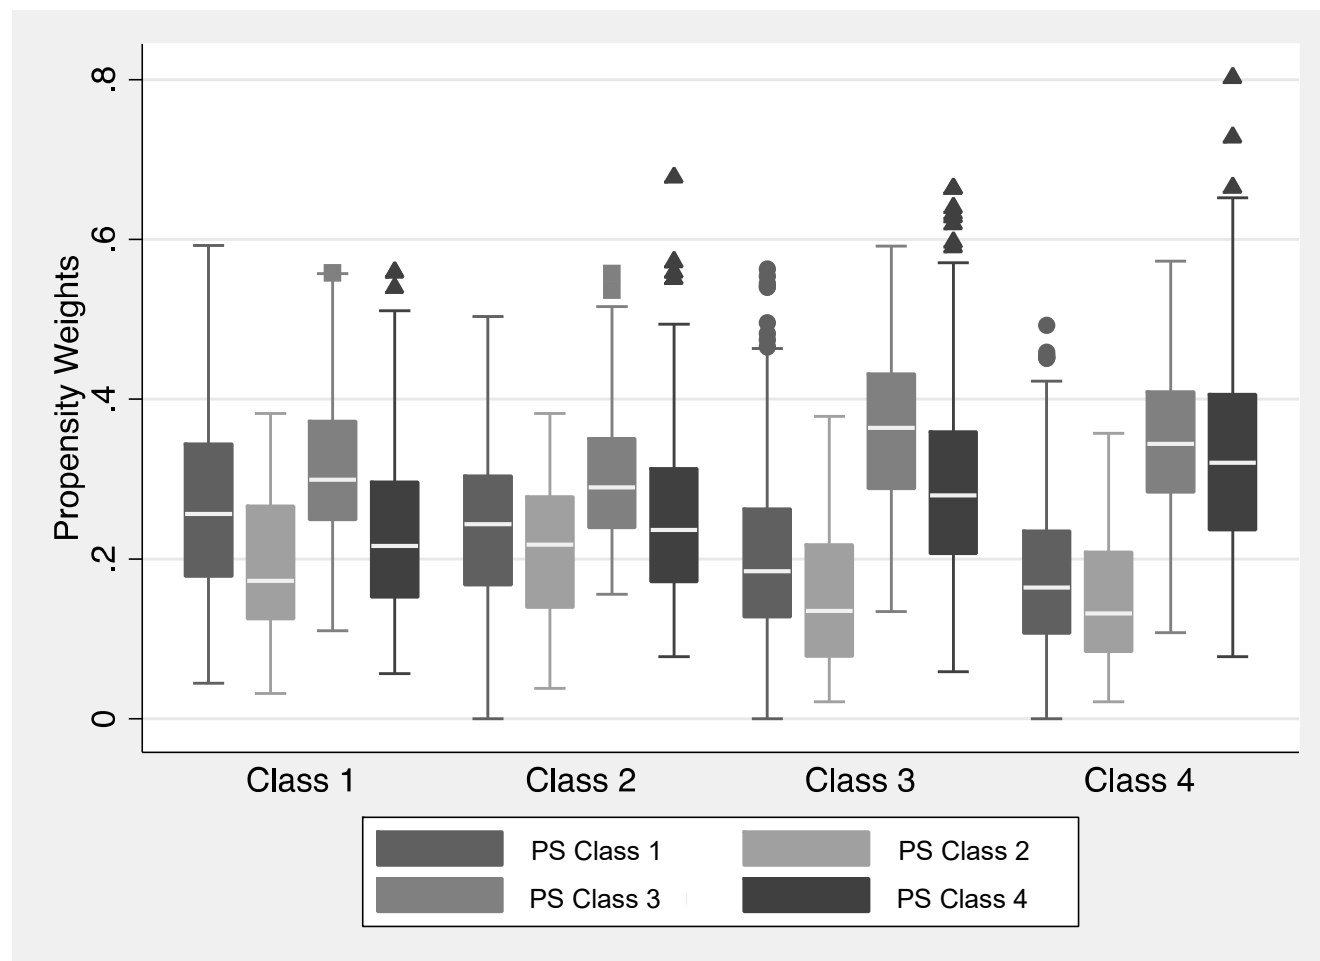

Note. PS = propensity score

Propensity scores generated using multinomial logistic regression of modal class assignment on baseline age (modeled flexibly using 5-year splines, i.e., >80, >85, >90), sex, race, education, study site, treatment group (intervention vs. control), number of comorbidities, significant depressive symptoms (CES-D $\geq$ 10). MCI status was not included as a covariate. Differences in range of propensity scores across classes suggest differences in covariate coverage.

Table D.1. Unadjusted and Adjusted Discrete-Time Proportional Hazards Models for Lifestyle Engagement Classes Predicting Time to Dementia Diagnosis using the Vermunt (2010) Approach

|                                                            | Model 1 (Unadjusted) |              |          | Model 2 (Adjusted) |              |         | Model 3 (stratified by MCI) |              |         |             |              |         |
|------------------------------------------------------------|----------------------|--------------|----------|--------------------|--------------|---------|-----------------------------|--------------|---------|-------------|--------------|---------|
|                                                            | HR                   | 95% CI       | P-value  | HR                 | 95% CI       | P-value | Non-MCI (n=2,587)           |              |         | MCI (n=481) |              |         |
|                                                            |                      |              |          |                    |              |         | HR                          | 95% CI       | P-value | HR          | 95% CI       | P-value |
| Lifestyle engagement group<br>(Ref: Class 4: Least Active) |                      |              |          |                    |              |         |                             |              |         |             |              |         |
| Class 1: Variety                                           | 0.549                | (0.40, 0.75) | <.001*** | 0.577              | (0.41, 0.81) | 0.002** | 0.608                       | (0.40, 0.94) | 0.024*  | 0.876       | (0.49, 1.57) | 0.656   |
| Class 2: Intellectual                                      | 0.432                | (0.27, 0.68) | <.001*** | 0.496              | (0.30, 0.81) | 0.005** | 0.540                       | (0.30, 0.97) | 0.039*  | 0.940       | (0.34, 2.59) | 0.904   |
| Class 3: Social                                            | 0.769                | (0.57, 1.03) | 0.077    | 0.798              | (0.59, 1.08) | 0.142   | 0.760                       | (0.51, 1.13) | 0.177   | 1.293       | (0.78, 2.14) | 0.320   |

Note:  $p < 0.05^*$ ,  $p < 0.01^{**}$ ,  $p < 0.001^{***}$ , all p-values are 2-sided.

Model 1 is unadjusted for covariates. Model 2 is adjusted for demographic (age, race, education category, treatment group, study site) and health covariates (medical comorbidities and depressive symptoms). Model 3 is stratified by MCI status. HR = hazard ratio, CI = confidence interval, MCI = Mild Cognitive Impairment.

Table D.2. Unadjusted and Adjusted Discrete-Time Proportional Hazards Models Excluding Individuals with Extreme Propensity Scores

|                                                            | Model 1 (Unadjusted) |              |          | Model 2 (Adjusted) |              |         | Model 3 (stratified by MCI) |              |         |             |              |         |
|------------------------------------------------------------|----------------------|--------------|----------|--------------------|--------------|---------|-----------------------------|--------------|---------|-------------|--------------|---------|
|                                                            | HR                   | 95% CI       | P-value  | HR                 | 95% CI       | P-value | Non-MCI (n=2,587)           |              |         | MCI (n=481) |              |         |
|                                                            | HR                   | 95% CI       | P-value  | HR                 | 95% CI       | P-value | HR                          | 95% CI       | P-value | HR          | 95% CI       | P-value |
| Lifestyle engagement group<br>(Ref: Class 4: Least Active) |                      |              |          |                    |              |         |                             |              |         |             |              |         |
| Class 1: Variety                                           | 0.605                | (0.47, 0.78) | <.001*** | 0.644              | (0.49, 0.84) | 0.001** | 0.659                       | (0.47, 0.92) | 0.014** | 0.956       | (0.62, 1.48) | 0.840   |
| Class 2: Intellectual                                      | 0.547                | (0.41, 0.73) | <.001*** | 0.617              | (0.46, 0.83) | 0.002** | 0.641                       | (0.44, 0.93) | 0.018** | 1.021       | (0.61, 1.72) | 0.939   |
| Class 3: Social                                            | 0.795                | (0.65, 0.98) | 0.031*   | 0.794              | (0.64, 0.98) | 0.032*  | 0.757                       | (0.57, 1.00) | 0.048*  | 1.189       | (0.85, 1.66) | 0.313   |

Note:  $p < 0.05^*$ ,  $p < 0.01^{**}$ ,  $p < 0.001^{***}$ , all p-values are 2-sided.

Model 1 is unadjusted for covariates. Model 2 is adjusted for demographic (age, race, education category, treatment group, study site) and health covariates (medical comorbidities and depressive symptoms). Model 3 is stratified by MCI status. HR = hazard ratio, CI = confidence interval, MCI = Mild Cognitive Impairment.

## Appendix E. Comparison with Activity Variety (Count) Approach

**Table E.1.** Unadjusted and Adjusted Discrete-Time Proportional Hazards Models for Activity Variety Predicting Time to Dementia Diagnosis

|                               | Model 1 (Unadjusted) |           |           | Model 2 (Adjusted) |           |           | Model 3 (stratified by MCI) |           |           |             |           |         |
|-------------------------------|----------------------|-----------|-----------|--------------------|-----------|-----------|-----------------------------|-----------|-----------|-------------|-----------|---------|
|                               | HR                   | 95% CI    | P-value   | HR                 | 95% CI    | P-value   | Non-MCI (n=2,587)           |           |           | MCI (n=481) |           |         |
|                               |                      |           |           |                    |           |           | HR                          | 95% CI    | P-value   | HR          | 95% CI    | P-value |
| Activity variety (count)      | 0.916                | 0.89,0.94 | <0.001*** | 0.933              | 0.91,0.96 | <0.001*** | 0.936                       | 0.90,0.97 | 0.001**   | 1.006       | 0.96,1.06 | 0.808   |
| Age                           |                      |           |           | 1.208              | 1.14,1.28 | <0.001*** | 1.198                       | 1.12,1.29 | <0.001*** | 1.168       | 1.06,1.29 | 0.003** |
| Age >80                       |                      |           |           | 0.927              | 0.83,1.03 | 0.177     | 0.927                       | 0.80,1.07 | 0.291     | 0.901       | 0.75,1.08 | 0.264   |
| Age >85                       |                      |           |           | 0.849              | 0.70,1.03 | 0.092     | 0.816                       | 0.62,1.07 | 0.135     | 1.037       | 0.79,1.36 | 0.791   |
| Age >90                       |                      |           |           | 1.483              | 0.97,2.26 | 0.066     | 1.809                       | 0.99,3.29 | 0.053     | 0.928       | 0.52,1.65 | 0.801   |
| Sex (male)                    |                      |           |           | 0.819              | 0.68,0.98 | 0.030*    | 0.813                       | 0.65,1.02 | 0.074     | 0.885       | 0.65,1.21 | 0.440   |
| Race (non-white)              |                      |           |           | 1.484              | 1.03,2.14 | 0.034*    | 1.055                       | 0.57,1.94 | 0.863     | 0.952       | 0.59,1.53 | 0.838   |
| Education (ref: <=HS)         |                      |           |           |                    |           |           |                             |           |           |             |           |         |
| Some college                  |                      |           |           | 0.930              | 0.74,1.17 | 0.535     | 0.953                       | 0.71,1.28 | 0.751     | 0.632       | 0.43,0.93 | 0.019*  |
| College graduate              |                      |           |           | 0.960              | 0.73,1.26 | 0.772     | 1.026                       | 0.73,1.43 | 0.879     | 1.067       | 0.65,1.76 | 0.800   |
| Professional/Graduate         |                      |           |           | 1.219              | 0.96,1.54 | 0.099     | 1.237                       | 0.91,1.68 | 0.170     | 0.750       | 0.51,1.11 | 0.149   |
| Study Site (ref: Wake Forest) |                      |           |           |                    |           |           |                             |           |           |             |           |         |
| UC Davis                      |                      |           |           | 0.887              | 0.70,1.12 | 0.316     | 1.020                       | 0.75,1.39 | 0.901     | 1.135       | 0.78,1.65 | 0.508   |
| Johns Hopkins                 |                      |           |           | 1.067              | 0.81,1.40 | 0.637     | 1.203                       | 0.85,1.71 | 0.302     | 1.153       | 0.74,1.79 | 0.528   |
| Pittsburgh                    |                      |           |           | 0.672              | 0.52,0.86 | 0.002**   | 0.742                       | 0.54,1.03 | 0.074     | 0.738       | 0.50,1.09 | 0.128   |
| Treatment group               |                      |           |           | 1.107              | 0.93,1.32 | 0.249     | 1.031                       | 0.83,1.28 | 0.786     | 1.096       | 0.82,1.46 | 0.533   |
| Medical comorbidities         |                      |           |           | 1.102              | 1.02,1.19 | 0.014*    | 1.161                       | 1.05,1.28 | 0.003**   | 1.017       | 0.89,1.16 | 0.800   |
| Depressive symptoms           |                      |           |           | 1.735              | 1.32,2.29 | <0.001*** | 1.936                       | 1.36,2.76 | <0.001*** | 1.019       | 0.65,1.60 | 0.933   |

(CES-D $\geq$ 10)Mean Cross-validated  
AUC

0.679

0.729

---

Note: HR = hazard ratio, CI = confidence interval, MCI = Mild Cognitive Impairment, HS = high school. Model 1 is unadjusted for covariates. Model 2 is adjusted for demographic (baseline age, study site, treatment group, sex, race, education category) and health covariates (medical comorbidities, significant depressive symptoms). Model 3 is stratified by MCI status. Mean ten-fold cross-validated area under the Receiver Operating Characteristic curves (AUC) are reported for non-stratified models.

p<0.05\*, p<0.01\*\*, p<0.001\*\*\*, all p-values are 2-sided.
